# Supplementary material for: Chemical Fractionation in Environmental Studies of Potentially Toxic Particulate-Bound Elements in Urban Air: A Critical Review
Source: MDPI journal article supplement (doi:10.3390/toxics10030124), 2022-03-04
Supplement: s1 [file s1]

# Supplementary Materials: Chemical Fractionation in Environmental Studies of Potentially Toxic Particulate-Bound Elements in Urban Air: A Critical Review

Ryszard Świetlik \* and Marzena Trojanowska

**Fernandez-Espinoza procedure**

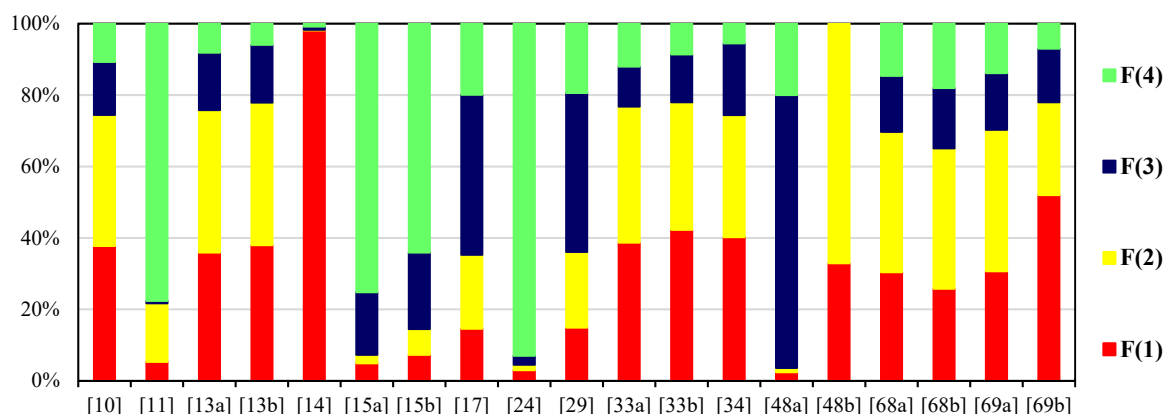

**BCR procedures**

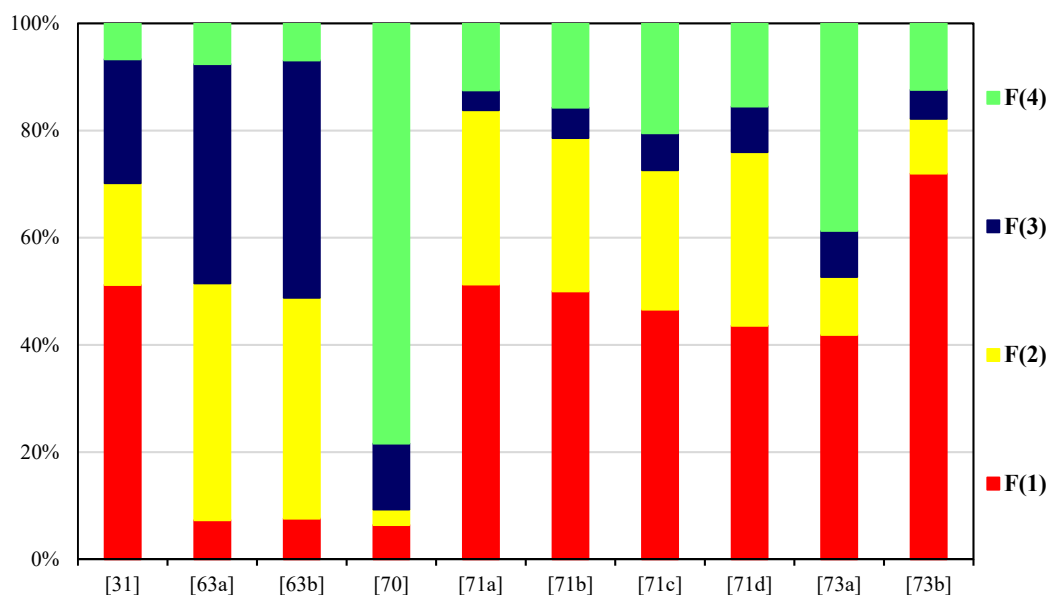

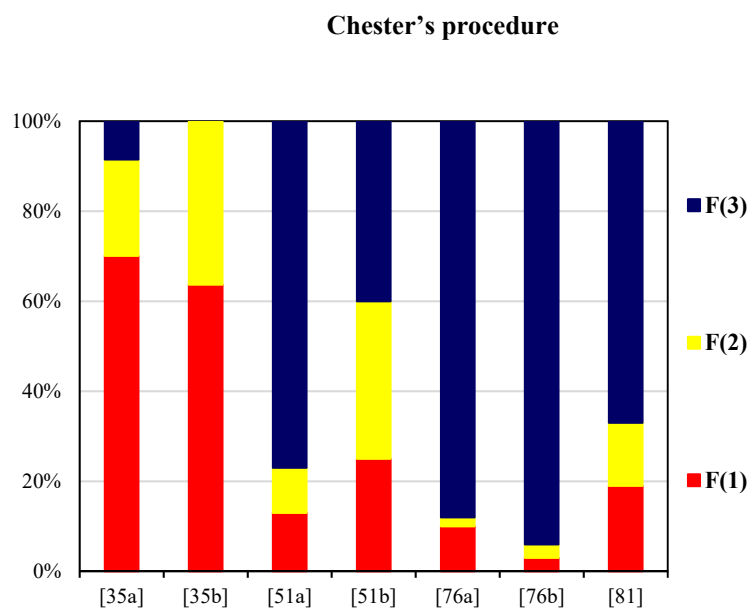

**Figure S1.** Operational speciation of As in urban atmospheric particulate matter based on literature data. The indexes *a*, *b*, *c* and *d* represent different data sets in the same article.

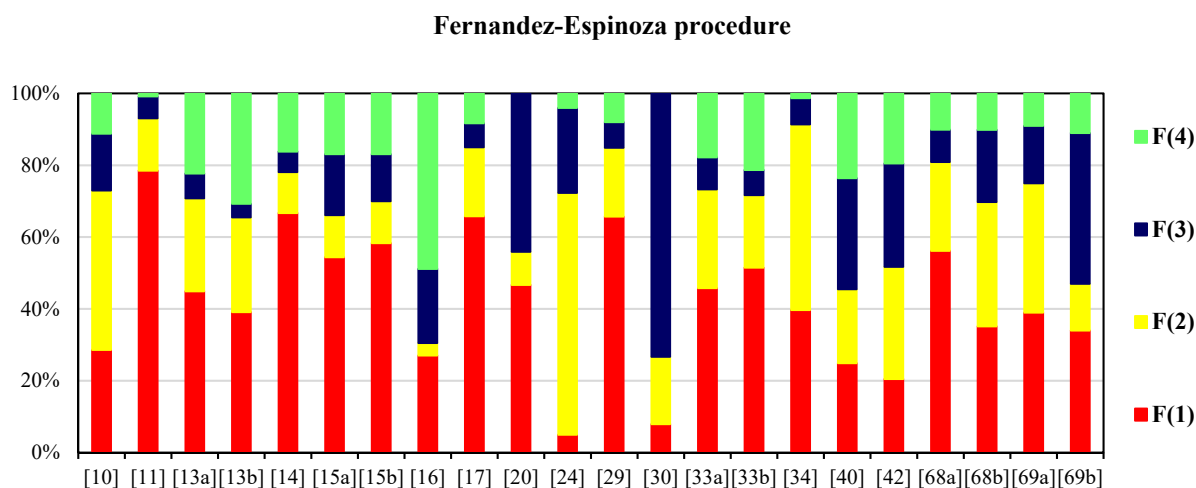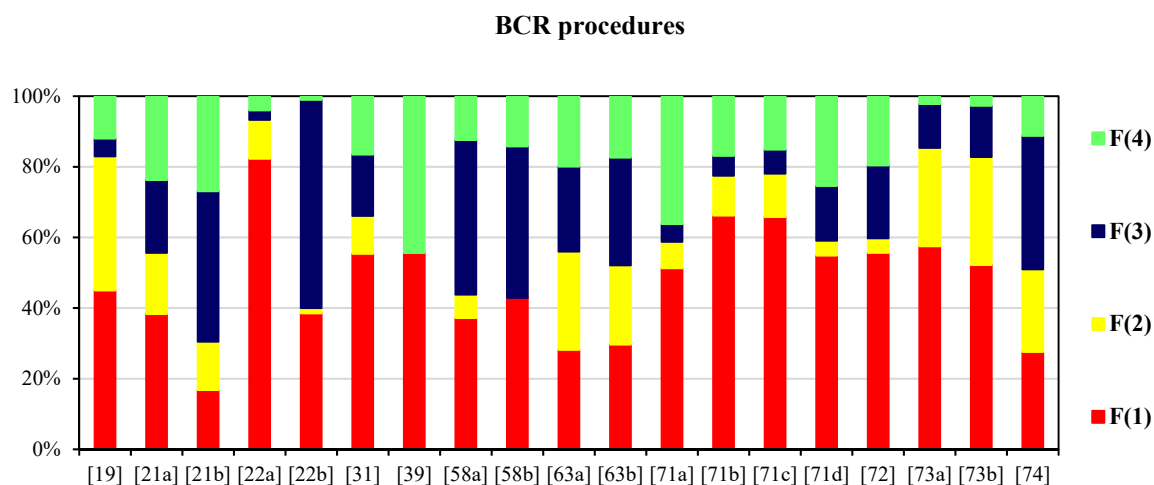

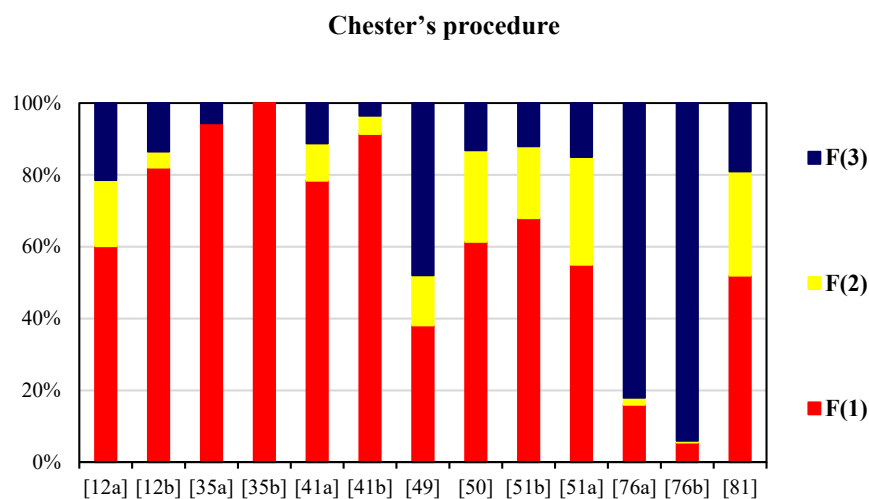

**Figure S2.** Operational speciation of Cd in urban atmospheric particulate matter based on literature data. The indexes *a*, *b*, *c* and *d* represent different data sets in the same article.

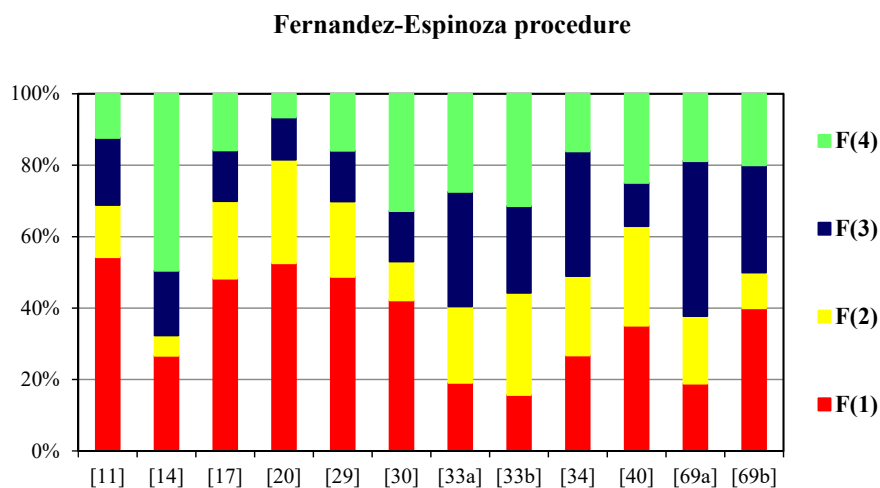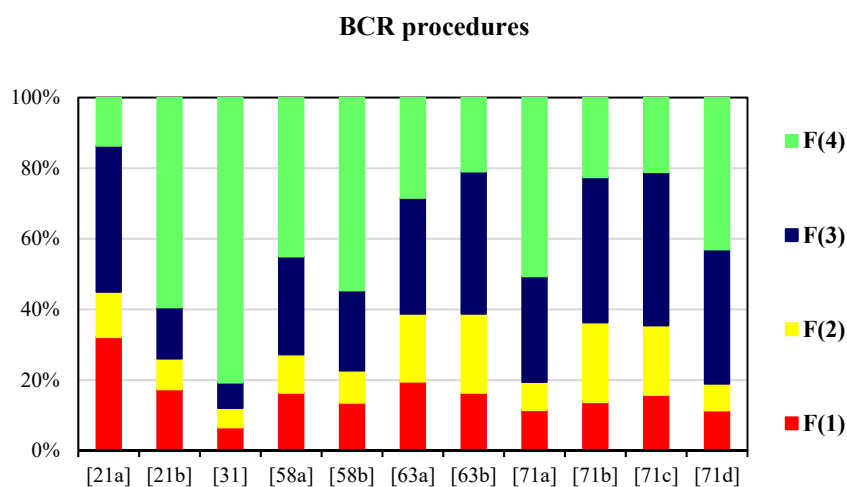

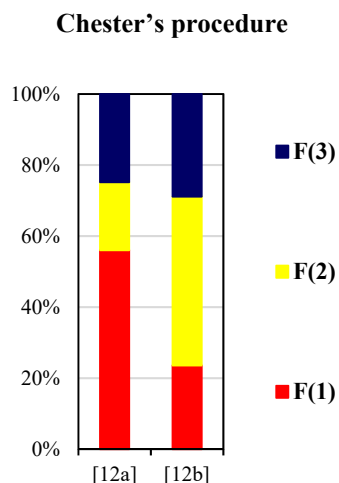

**Figure S3.** Operational speciation of Co in urban atmospheric particulate matter based on literature data. The indexes *a*, *b*, *c* and *d* represent different data sets in the same article.

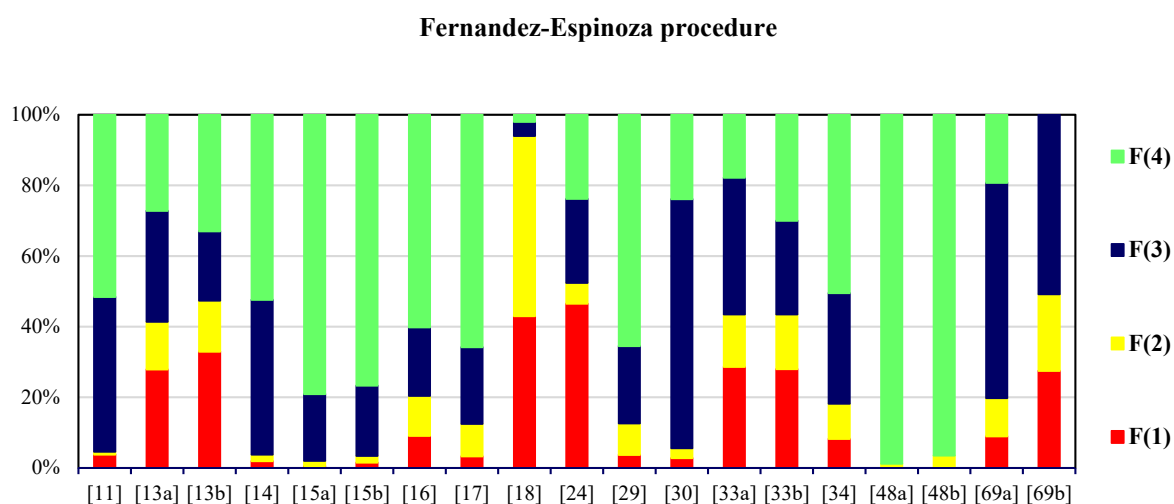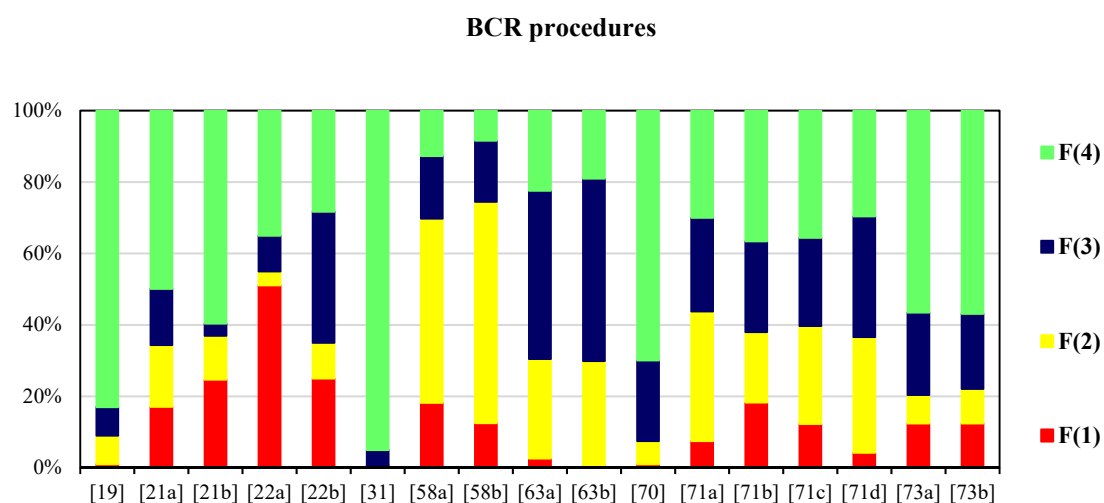

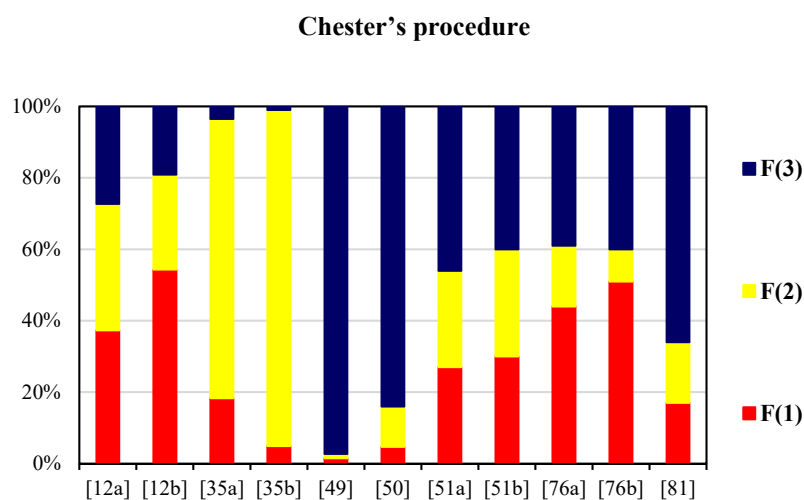

**Figure S4.** Operational speciation of Cr in urban atmospheric particulate matter based on literature data. The indexes *a*, *b*, *c* and *d* represent different data sets in the same article.

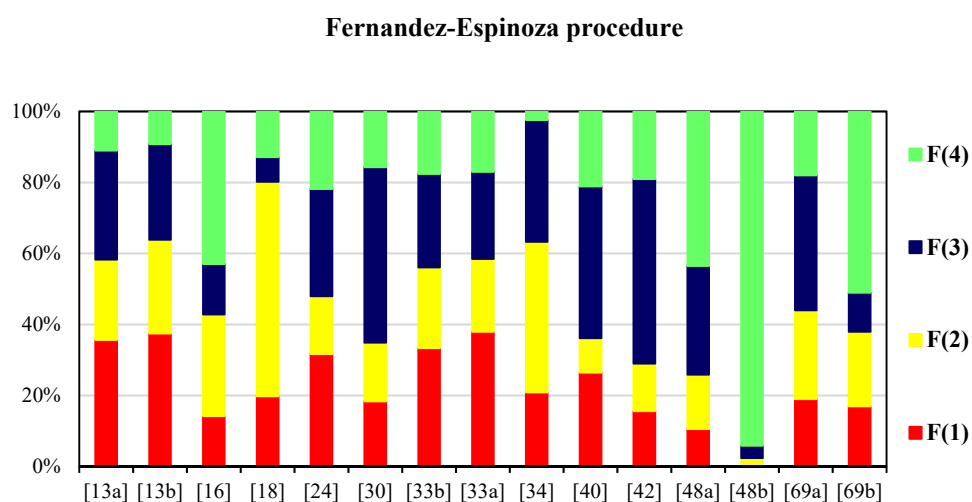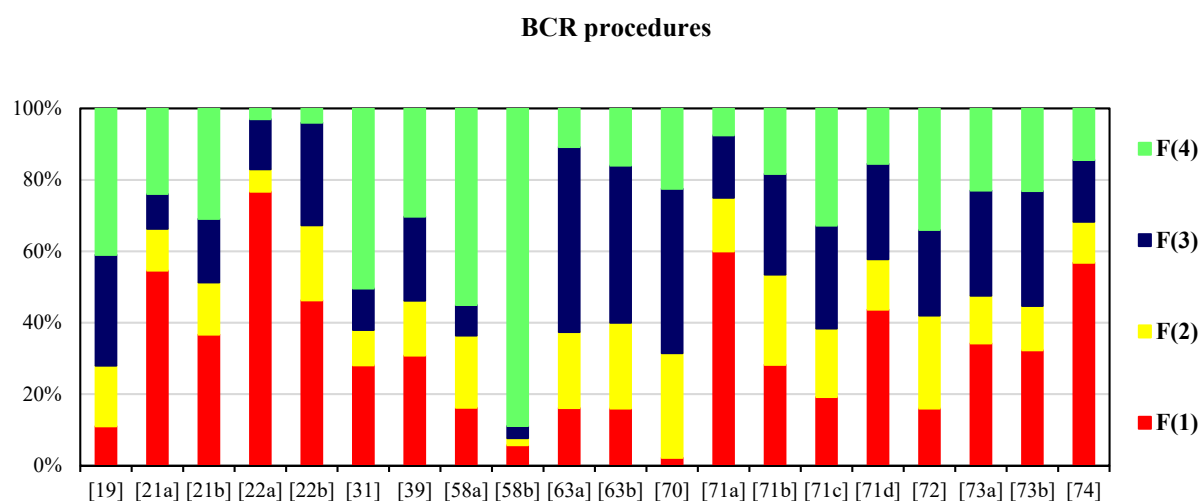

### Chester's procedure

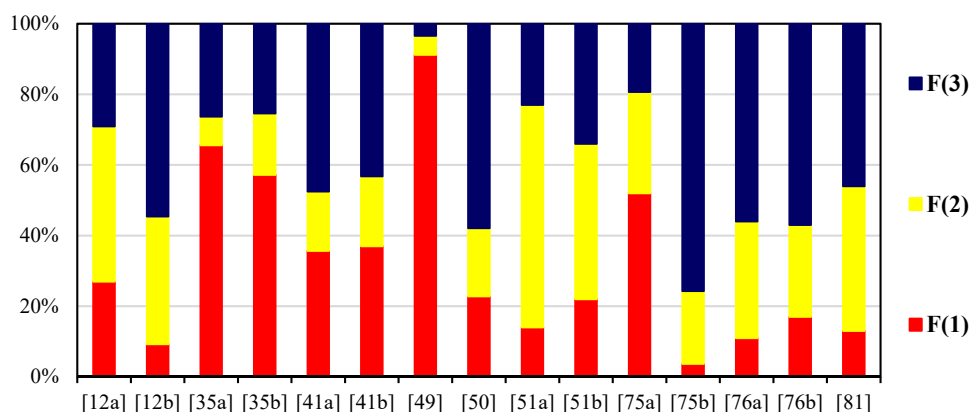

**Figure S5.** Operational speciation of Cu in urban atmospheric particulate matter based on literature data. The indexes *a*, *b*, *c* and *d* represent different data sets in the same article.

### Fernandez-Espinoza procedure

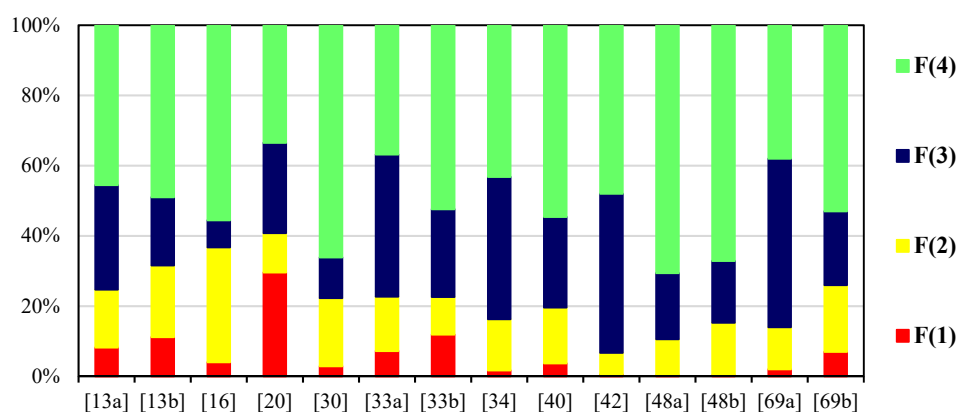

### BCR procedures

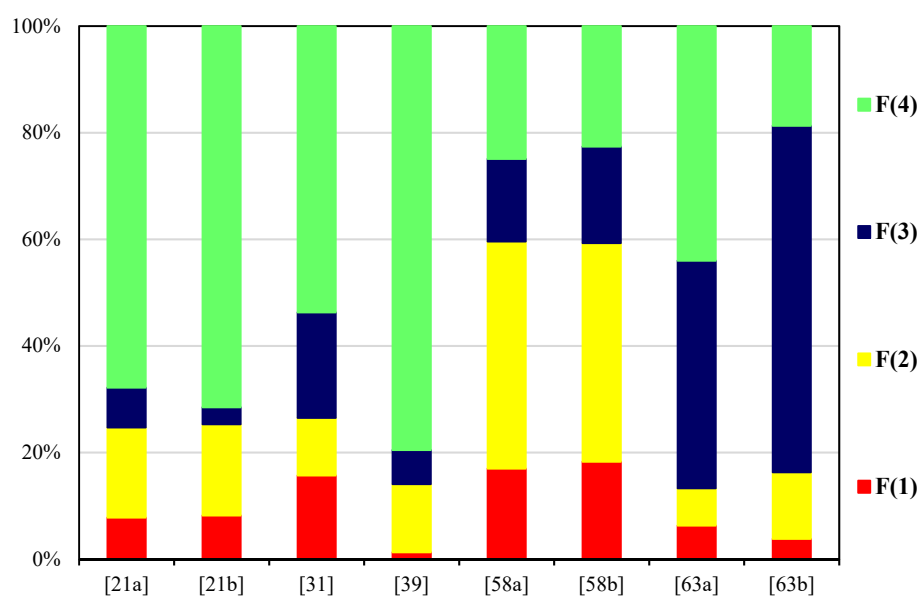

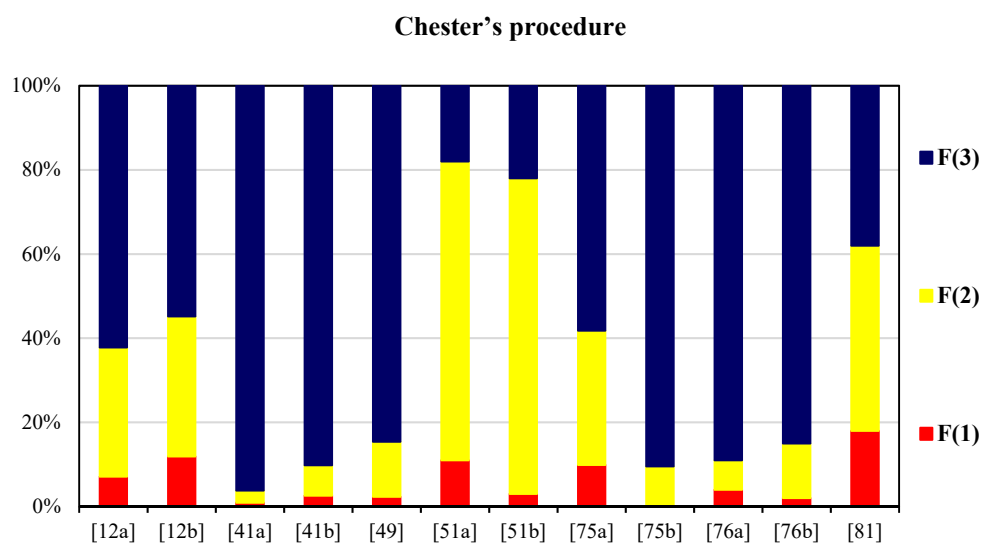

**Figure S6.** Operational speciation of Fe in urban atmospheric particulate matter based on literature data. The indexes *a*, *b*, *c* and *d* represent different data sets in the same article.

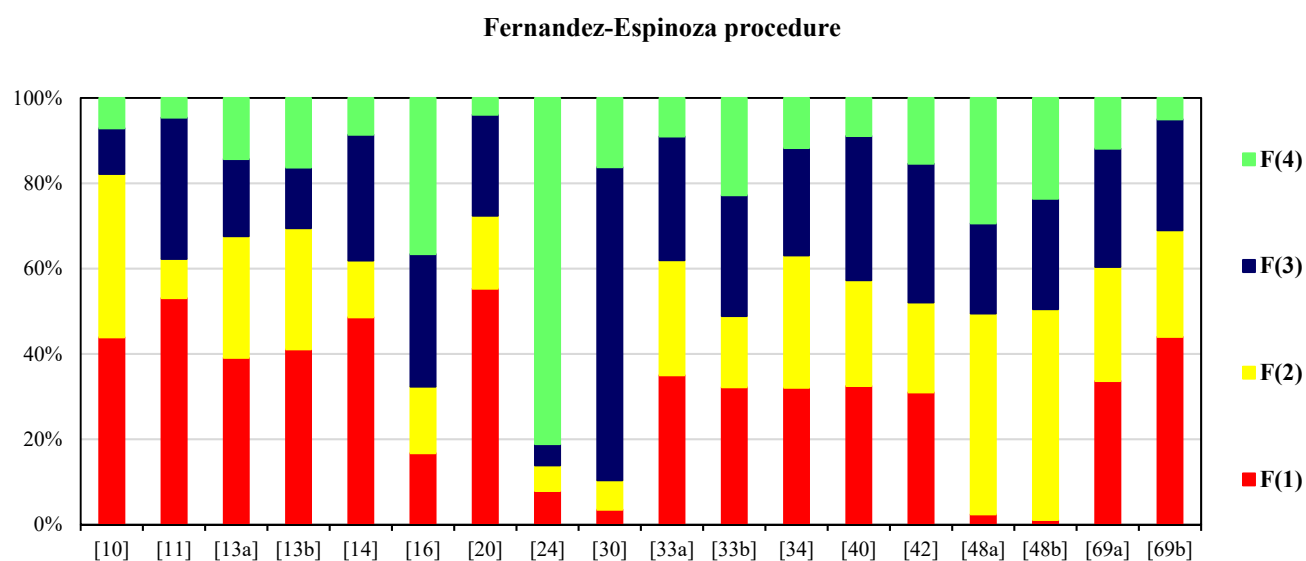

### BCR procedures

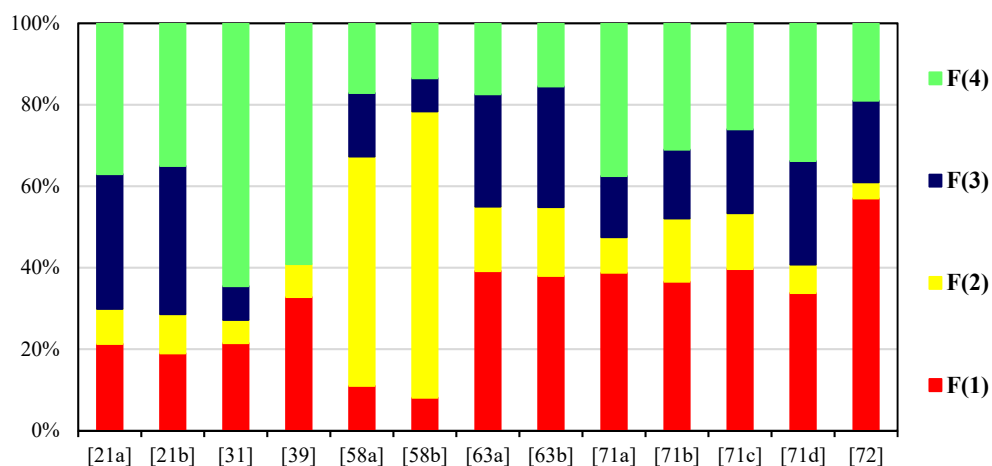

**Chester's procedure**

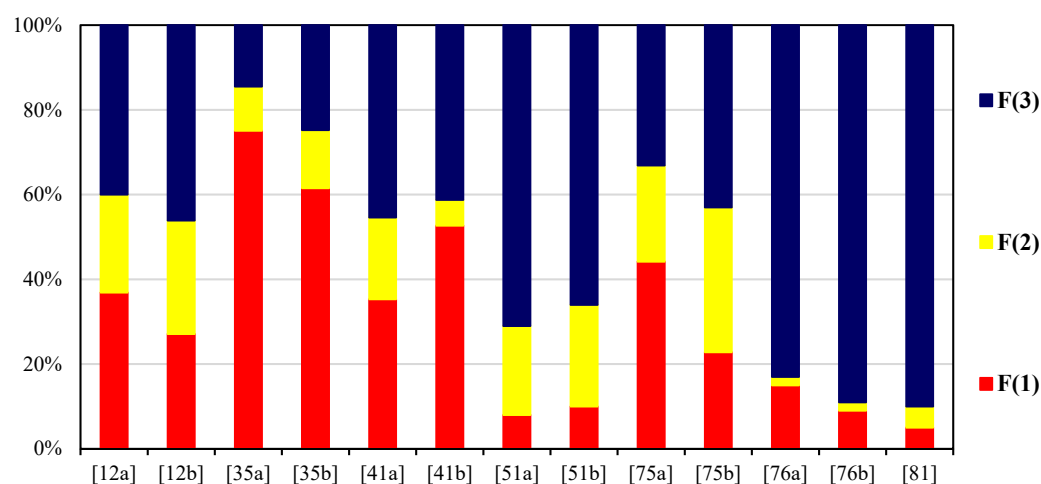

**Figure S7.** Operational speciation of Mn in urban atmospheric particulate matter based on literature data. The indexes *a*, *b*, *c* and *d* represent different data sets in the same article.

**Fernandez-Espinoza procedure**

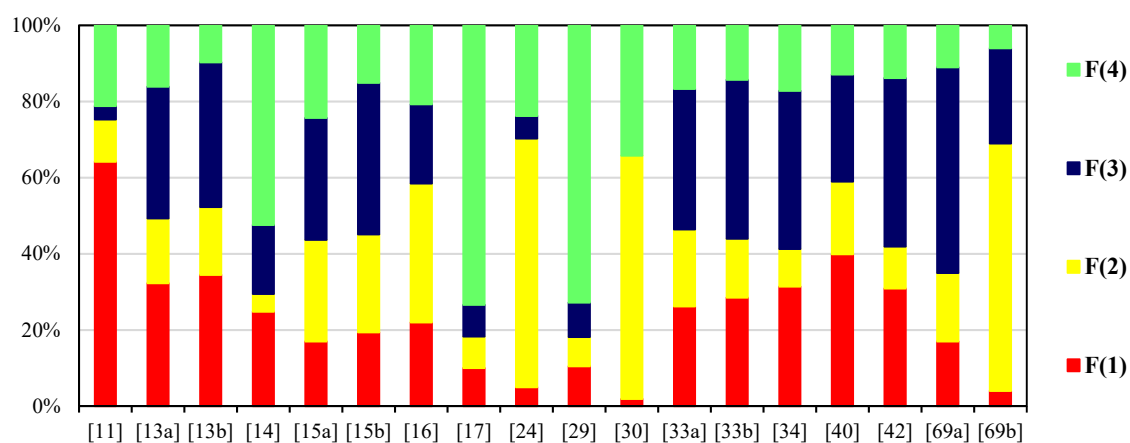



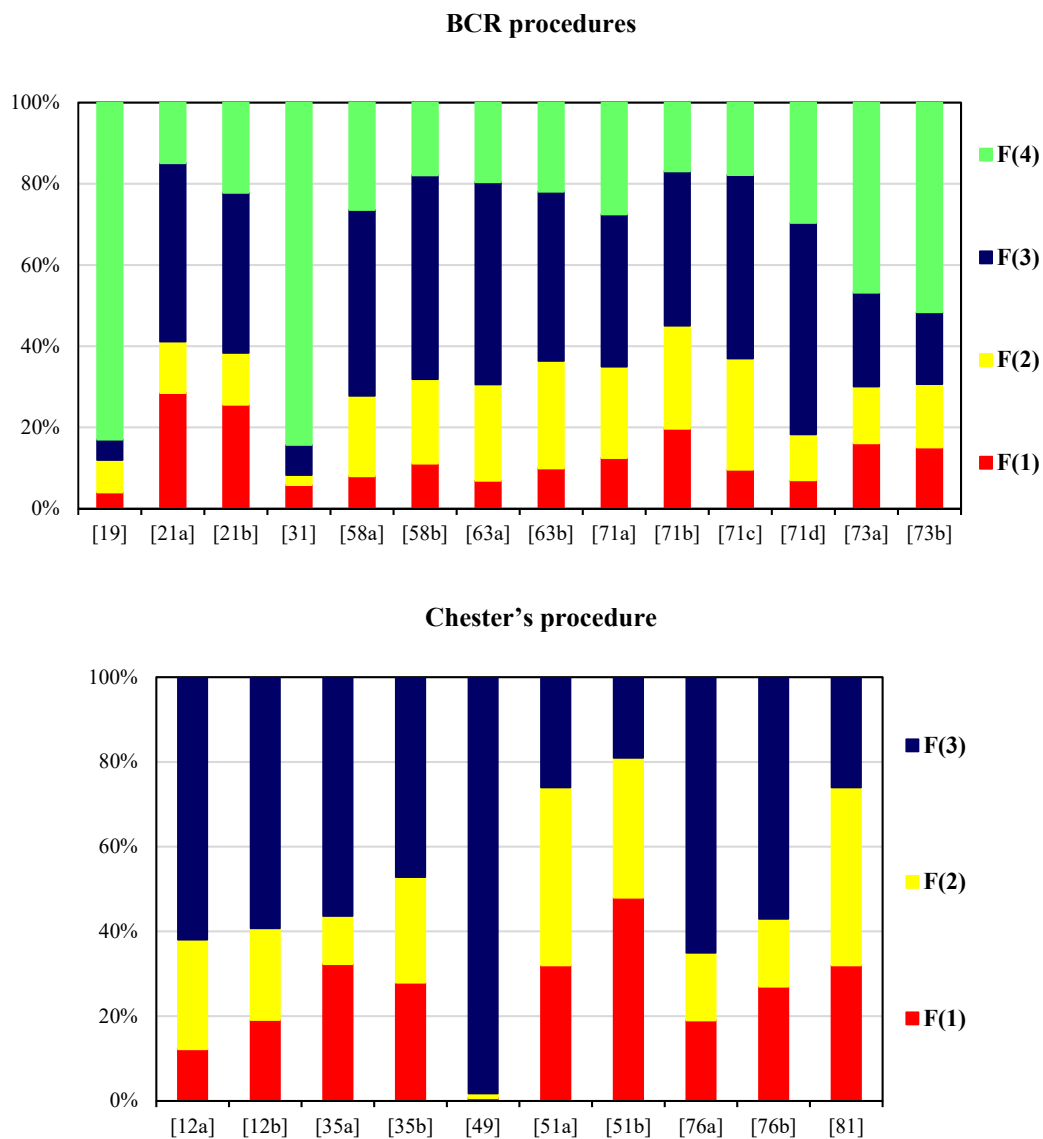

**Figure S8.** Operational speciation of Ni in urban atmospheric particulate matter based on literature data. The indexes *a*, *b*, *c* and *d* represent different data sets in the same article.

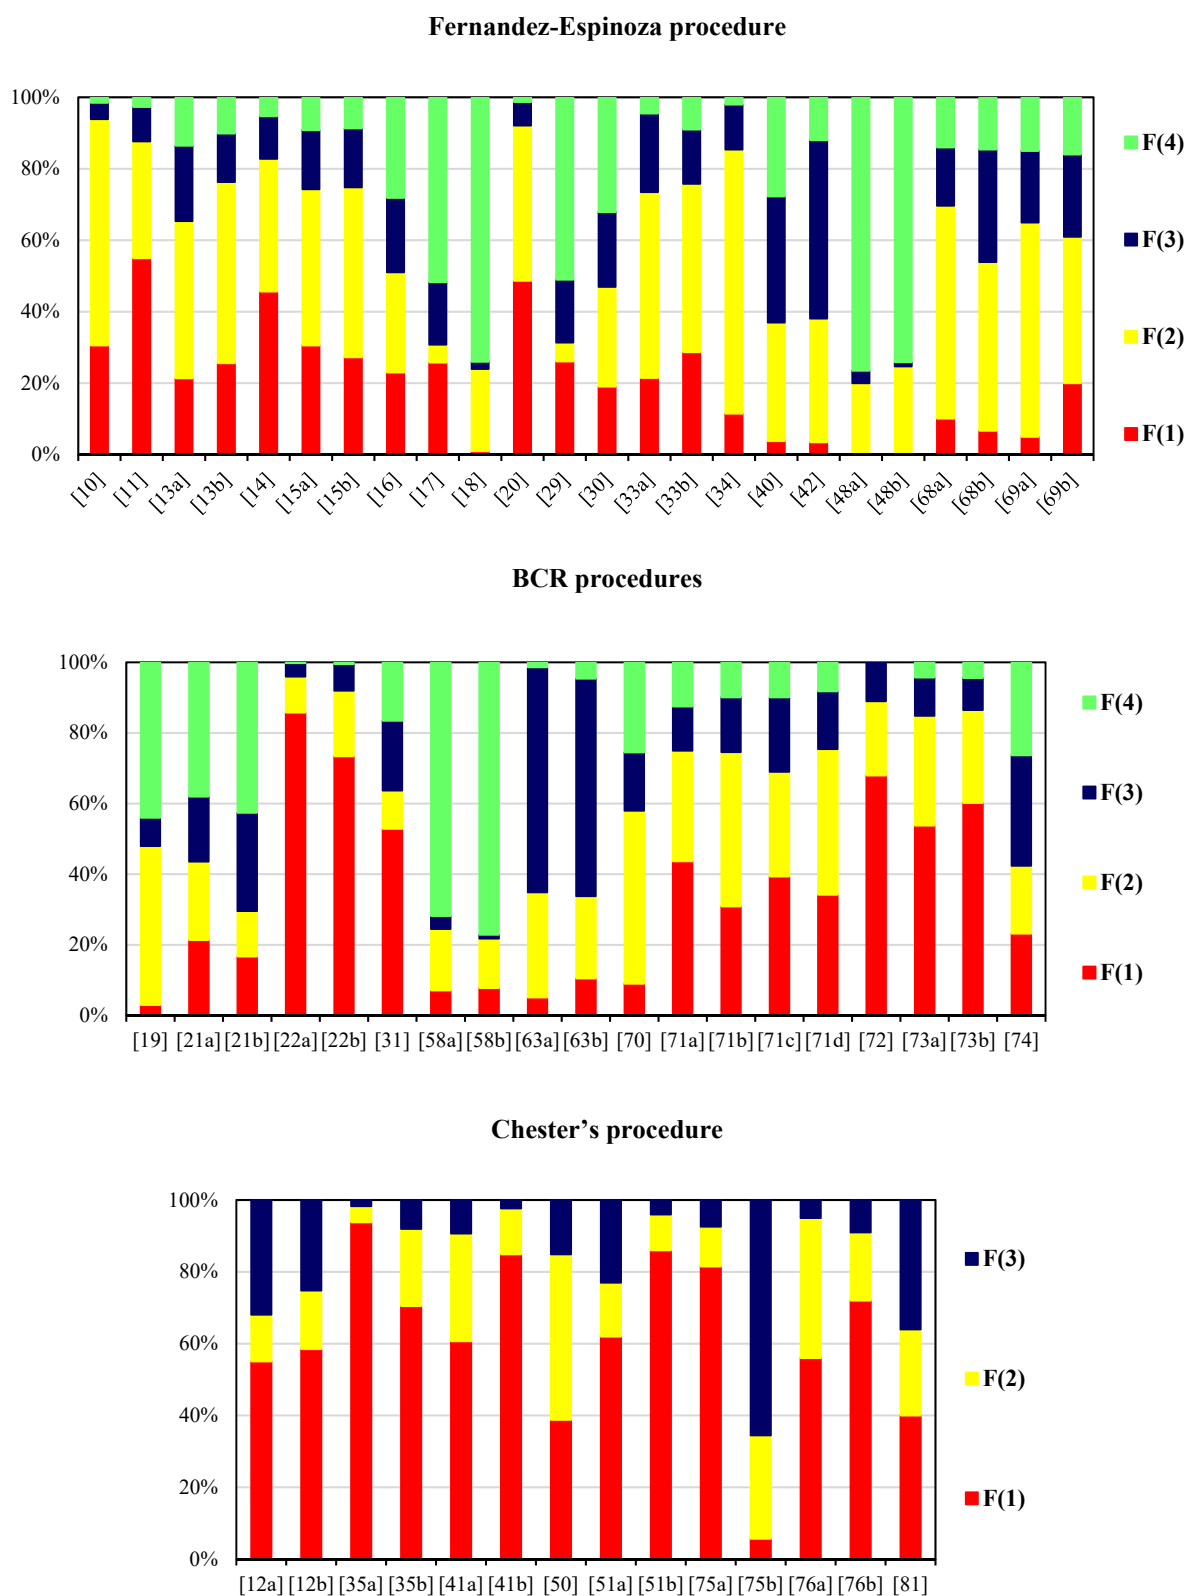

**Figure S9.** Operational speciation of Pb in urban atmospheric particulate matter based on literature data. The indexes *a*, *b*, *c* and *d* represent different data sets in the same article.

### Fernandez-Espinoza procedure

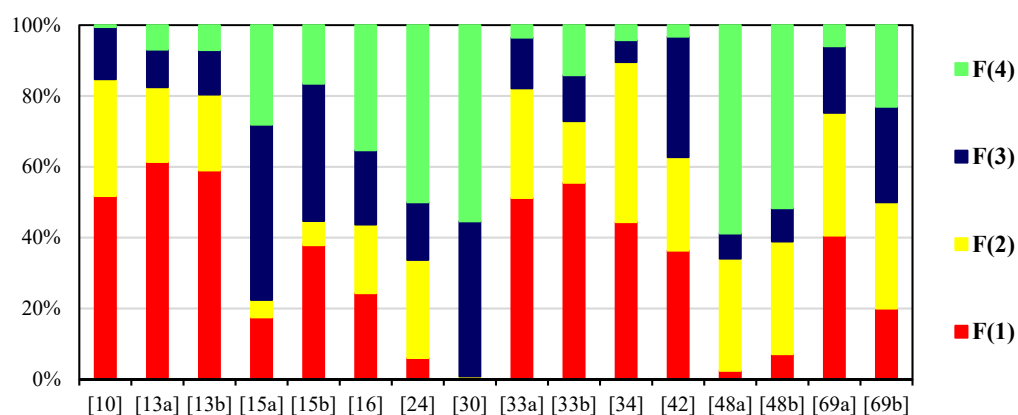

### BCR procedures

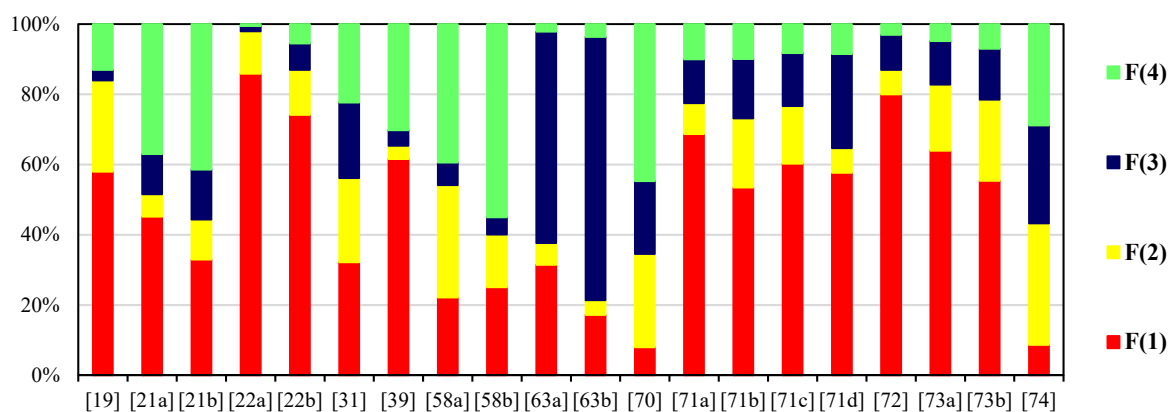

### Chester's procedure

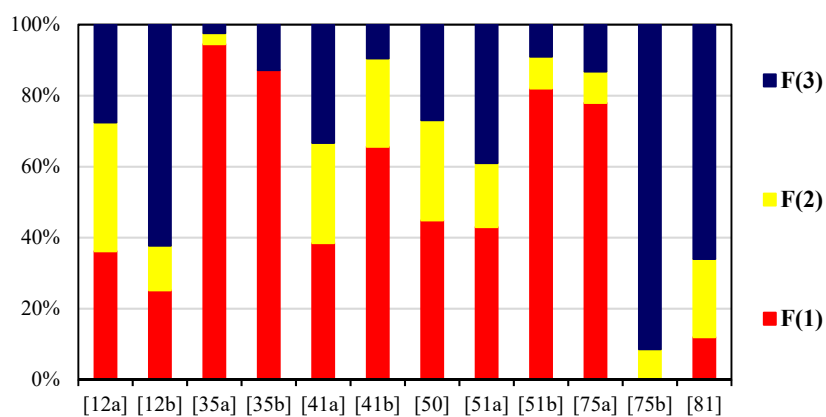

**Figure S10.** Operational speciation of Zn in urban atmospheric particulate matter based on literature data. The indexes *a*, *b*, *c* and *d* represent different data sets in the same article.
